# Supplementary material for: The development and validation of a new method for the fast determination of Al, Ba, Ca, Cu, Fe, K, Mg, Mn, Na, Sr and Zn in rice by inductively coupled plasma optical emission spectrometry
Source: Royal Society of Chemistry journal article supplement (doi:10.1039/d4ay00890a), 2024-01-01
Supplement: d4ay00890a2.pdf [file d4ay00890a2.pdf]

**Table 1S**

The operating conditions for the Agilent 5110 ICP OES instrument used in this work

---

RF power (kW): 1.2

Plasma flow rate (L min<sup>-1</sup>): 12.0

Auxiliary flow rate (L min<sup>-1</sup>): 1.00

Nebulizer flow rate (L min<sup>-1</sup>): 0.70

Standard pump speed (mL min<sup>-1</sup>): 0.8 for solution uptake and 1.3 for drainage

Fast pump speed (mL min<sup>-1</sup>): 3.3 (during solution uptake and rinsing)

Viewing mode: SVDV

Viewing height (mm): 8

Replicate read time (s): 5

Stabilization time (s): 15

Sample uptake delay time (s): 10

Number of replicates: 3

Background correction: fitted (to correct for the spectral interferences)

Analytical lines (nm): Al I 396.15, Ba II 455.40, Ca II 396.85, Cu I 327.40, Fe II 238.20,

K I 766.49, Mg II 279.55, Mn II 257.61, Na I 589.59, Sr II 407.77, Zn I 213.86

---

I and II denote the atomic and ionic lines, respectively.

**Table 2S**

The planned treatments within the Box-Behnken response surface design, giving the uncoded and coded values of the studied parameters: **A** (the temperature of water filling the ultrasonic bath, in °C), **B** (the sonication time, in min) and **C** (the volume of a concentrated HNO<sub>3</sub> solution added per 0.5 g of rice, in mL), as well as their standard and run orders

| Standard order | Run order       | A, °C   | B, min  | C, mL    |
|----------------|-----------------|---------|---------|----------|
| 14             | 1 <sup>#</sup>  | 40 (0)  | 20 (0)  | 2.5 (0)  |
| 8              | 2               | 60 (+1) | 20 (0)  | 4.0 (+1) |
| 1              | 3               | 20 (-1) | 10 (-1) | 2.5 (0)  |
| 13             | 4 <sup>#</sup>  | 40 (0)  | 20 (0)  | 2.5 (0)  |
| 9              | 5               | 40 (0)  | 10 (-1) | 1.0 (-1) |
| 10             | 6               | 40 (0)  | 30 (+1) | 1.0 (-1) |
| 2              | 7               | 60 (+1) | 10 (-1) | 2.5 (0)  |
| 7              | 8               | 20 (-1) | 20 (0)  | 4.0 (+1) |
| 12             | 9               | 40 (0)  | 30 (+1) | 4.0 (+1) |
| 3              | 10              | 20 (-1) | 30 (+1) | 2.5 (0)  |
| 5              | 11              | 20 (-1) | 20 (0)  | 1.0 (-1) |
| 11             | 12              | 40 (0)  | 10 (-1) | 4.0 (+1) |
| 15             | 13 <sup>#</sup> | 40 (0)  | 20 (0)  | 2.5 (0)  |
| 4              | 14              | 60 (+1) | 30 (+1) | 2.5 (0)  |
| 6              | 15              | 60 (+1) | 20 (0)  | 1.0 (-1) |

<sup>#</sup> The center point.

**Table 3S**

The outcomes of the analysis of variance (ANOVA) for the response surface regression models established for the developed ultrasound-assisted extraction (USAE) sample preparation procedure of rice before its multielement analysis by ICP OES. The *p*-values for the model and the terms (linear, square, and 2-way interactions) included in them as well the lack-of-fit test are given in addition to the determination coefficients ( $R^2$ ). The equations of the response surface regression models were found by using the stepwise-selection-of-terms procedure ( $\alpha$  to enter = 0.15,  $\alpha$  to remove = 0.15). In all experiments, the WR0 material was used

| Model                                                                                                                                                         | <i>p</i> -values                    |                        |                          |             | $R^2$ , % |
|---------------------------------------------------------------------------------------------------------------------------------------------------------------|-------------------------------------|------------------------|--------------------------|-------------|-----------|
|                                                                                                                                                               | Linear                              | Square                 | 2-way interaction        | Lack-of-fit |           |
| Al<br>0.000                                                                                                                                                   | A (0.006)<br>B (0.099)<br>C (0.000) | C <sup>2</sup> (0.099) | AC (0.053)               | 0.889       | 92.0      |
| $C_{Al} = -2.00 \times 10^{-2} - 1.55 \times 10^{-3}A + 3.32 \times 10^{-3}B - 7.71 \times 10^{-2}C + 2.16 \times 10^{-2}C^2 + 1.90 \times 10^{-3}AC$         |                                     |                        |                          |             |           |
| Ba<br>0.013                                                                                                                                                   | A (0.522)<br>B (0.038)<br>C (0.010) | -                      | AC (0.019)<br>BC (0.109) | 0.166       | 75.8      |
| $C_{Ba} = 4.85 \times 10^{-1} - 8.16 \times 10^{-4}A + 1.47 \times 10^{-3}B - 1.45 \times 10^{-2}C + 2.97 \times 10^{-4}AC$                                   |                                     |                        |                          |             |           |
| Ca<br>0.061                                                                                                                                                   | A (0.287)<br>C (0.209)              | -                      | AC (0.024)               | 0.569       | 47.4      |
| $C_{Ca} = 5.29 \times 10^1 - 1.78 \times 10^{-1}A - 2.84C + 6.01 \times 10^{-2}AC$                                                                            |                                     |                        |                          |             |           |
| Cu<br>0.035                                                                                                                                                   | B (0.026)<br>C (0.593)              | C <sup>2</sup> (0.040) | -                        | 0.414       | 52.8      |
| $C_{Cu} = 1.67 - 2.68 \times 10^{-2}B - 8.31 \times 10^{-1}C - 1.56 \times 10^{-1}C^2$                                                                        |                                     |                        |                          |             |           |
| Fe<br>0.033                                                                                                                                                   | A (0.954)<br>B (0.639)<br>C (0.005) | A <sup>2</sup> (0.133) | AC (0.069)<br>BC (0.120) | 0.175       | 76.0      |
| $C_{Fe} = 1.85 - 2.87 \times 10^{-2}A - 1.80 \times 10^{-2}B - 1.83 \times 10^{-1}C + 2.39 \times 10^{-4}A^2 + 3.87 \times 10^{-3}AC + 6.42 \times 10^{-3}BC$ |                                     |                        |                          |             |           |
| K<br>0.000                                                                                                                                                    | A (0.427)<br>B (0.700)<br>C (0.000) | C <sup>2</sup> (0.000) | AB (0.123)               | 0.249       | 94.8      |
| $C_K = 4.78 \times 10^2 - 6.63 \times 10^{-1}A - 1.04B + 7.18 \times 10^1C - 1.11 \times 10^1C^2 + 2.82 \times 10^{-2}AB$                                     |                                     |                        |                          |             |           |
| Mg<br>0.387                                                                                                                                                   | A (0.521)<br>B (0.647)              | -                      | AB (0.131)               | 0.448       | 23.2      |
| $C_{Mg} = 1.97 \times 10^2 - 3.86 \times 10^{-1}A - 6.07 \times 10^{-1}B + 1.69 \times 10^{-1}AB$                                                             |                                     |                        |                          |             |           |
| Mn<br>0.018                                                                                                                                                   | A (0.057)<br>B (0.405)<br>C (0.010) | AB (0.060)             | -                        | 0.380       | 66.7      |
| $C_{Mn} = 9.19 - 1.20 \times 10^{-2}A - 1.52 \times 10^{-2}B + 6.28 \times 10^{-2}C + 4.43 \times 10^{-4}AB$                                                  |                                     |                        |                          |             |           |
| Na                                                                                                                                                            |                                     |                        |                          |             |           |

|       |                                                          |                               |                                        |       |      |
|-------|----------------------------------------------------------|-------------------------------|----------------------------------------|-------|------|
| 0.011 | <b>A</b> (0.776)<br><b>B</b> (0.730)<br><b>C</b> (0.003) | <b>C</b> <sup>2</sup> (0.006) | <b>AC</b> (0.103)<br><b>BC</b> (0.142) | 0.193 | 82.4 |
|-------|----------------------------------------------------------|-------------------------------|----------------------------------------|-------|------|

$$C_{Na} = 3.64 - 3.25 \times 10^{-2}A - 5.61 \times 10^{-2}B + 1.31C - 3.82 \times 10^{-1}C^2 + 1.40 \times 10^{-2}AC + 2.47 \times 10^{-2}BC$$


---

|       |                  |                               |   |       |      |
|-------|------------------|-------------------------------|---|-------|------|
| Sr    |                  |                               |   |       |      |
| 0.047 | <b>C</b> (0.111) | <b>C</b> <sup>2</sup> (0.045) | - | 0.795 | 39.8 |

$$C_{Sr} = 1.88 \times 10^{-1} - 3.08 \times 10^{-3}C - 5.33 \times 10^{-4}C^2$$


---

|       |                                                          |                               |                   |       |      |
|-------|----------------------------------------------------------|-------------------------------|-------------------|-------|------|
| Zn    |                                                          |                               |                   |       |      |
| 0.002 | <b>A</b> (0.129)<br><b>B</b> (0.526)<br><b>C</b> (0.000) | <b>C</b> <sup>2</sup> (0.083) | <b>AB</b> (0.092) | 0.656 | 88.3 |

$$C_{Zn} = 1.48 \times 10^1 - 2.25 \times 10^{-2}A - 6.63 \times 10^{-2}B + 4.70C \times 10^{-1} - 8.15 \times 10^{-1}C^2 + 8.56 \times 10^{-4}AC + 1.12 \times 10^{-2}BC$$


---

**A:** The temperature of water filling the ultrasonic bath (in °C).

**B:** The sonication time (in min).

**C:** The volume of a concentrated HNO<sub>3</sub> solution added per 0.5 g of rice (in mL).

**Table 4S**

The individually optimized settings of the parameters of the ultrasound-assisted extraction (USAE), i.e., **A** – the temperature of water filling the ultrasonic bath (in °C), **B** – the sonication time (in min), and **C** – the volume of a concentrated HNO<sub>3</sub> solution added per 0.5 g of rice (in mL), based on the established response surface regression models. In all experiments, the WR0 material was used

| Element | Target value <sup>a</sup> | Fitted value <sup>b</sup> | <i>d</i> | A, °C | B, min | C, mL |
|---------|---------------------------|---------------------------|----------|-------|--------|-------|
| Al      | 0.498±0.038               | 0.479±0.170               | 0.963    | 60    | 30     | 1.0   |
| Ba      | 0.451±0.020               | 0.449±0.023               | 0.956    | 60    | 30     | 4.0   |
| Ca      | 48.5±0.8                  | 47.7±3.9                  | 0.871    | -     | 20     | 1.0   |
| Cu      | 2.04±0.14                 | 2.04±0.62                 | 1.000    | -     | 15     | 4.0   |
| Fe      | 1.35±0.14                 | 1.35±0.35                 | 1.000    | 60    | 21     | 4.0   |
| K       | 543±3                     | 543±9                     | 1.00     | 40    | 20     | 1.7   |
| Mg      | 184±1                     | 184±8                     | 1.000    | 46    | 30     | -     |
| Mn      | 9.09±0.04                 | 9.09±0.19                 | 1.000    | 22    | 17     | 4.0   |
| Na      | 4.80±0.35                 | 4.80±0.66                 | 1.000    | 40    | 20     | 2.6   |
| Sr      | 0.190±0.006               | 0.190±0.004               | 1.000    | -     | -      | 1.0   |
| Zn      | 14.8±0.1                  | 14.8±0.4                  | 1.000    | 40    | 26     | 4.0   |

*d* The individual desirability.

<sup>a</sup> The mean value along with the standard deviation obtained by using the wet digestion procedure followed by the analysis of the resulting sample solutions by ICP OES, n=3.

<sup>b</sup> The value along with the standard deviation obtained by using the response surface regression models, n=15.

**Table 5S**

The outcomes of the two-sided one-way Welch analysis of variance (ANOVA) and the *post-hoc* Fisher least significance difference (LSD) test used to compare different rice samples, *i.e.*, white rice (WR), basmati rice (BR), jasmine rice (JR), parboiled rice (PBR), and red rice (RR)

| <i>F</i> -value <sup>a</sup> | <i>p</i> -value <sup>b</sup> | Concentration, $\mu\text{g g}^{-1}$ |             |             |             |             | Differences <sup>c</sup>                                                          |
|------------------------------|------------------------------|-------------------------------------|-------------|-------------|-------------|-------------|-----------------------------------------------------------------------------------|
|                              |                              | WR, n=5                             | BR, n=2     | JR, n=2     | PBR, n=2    | RR, n=2     |                                                                                   |
| Al                           |                              |                                     |             |             |             |             |                                                                                   |
| 9.86                         | 0.044                        | 0.979±1.422                         | 0.513±0.031 | 0.296±0.029 | 0.330±0.020 | 0.478±0.117 | -                                                                                 |
| Ba                           |                              |                                     |             |             |             |             |                                                                                   |
| 8175.17                      | 0.000                        | 0.248±0.152                         | 0.088±0.007 | 0.338±0.005 | 0.112±0.028 | 2.65±0.01   | BR-JR (<0.050), BR-RR (0.000), JR-RR (0.000), PBR-RR (0.000), WR-RR (0.000)       |
| Ca                           |                              |                                     |             |             |             |             |                                                                                   |
| 23.34                        | 0.021                        | 132±206                             | 54.5±4.8    | 39.6±1.3    | 32.0±29.3   | 98.3±6.6    | -                                                                                 |
| Fe                           |                              |                                     |             |             |             |             |                                                                                   |
| 86.25                        | 0.002                        | 1.57±0.84                           | 2.01±0.38   | 1.24±0.47   | 2.28±1.51   | 7.98±0.27   | BR-RR (0.000), JR-RR (0.000), PBR-RR (0.000), WR-RR (0.000)                       |
| K                            |                              |                                     |             |             |             |             |                                                                                   |
| 638.30                       | 0.000                        | 875±433                             | 766±8       | 569±17      | 1800±247    | 2380±35     | BR-PBR (0.012), BR-RR (0.001), JR-PBR (0.005), JR-RR (0.000), PBR-WR (0.009), WR- |

|              |       |             |             |             |             |             | RR (0.000)                                                                                       |
|--------------|-------|-------------|-------------|-------------|-------------|-------------|--------------------------------------------------------------------------------------------------|
| Mg<br>513.56 | 0.000 | 192±109     | 138±13      | 116±28      | 302±173     | 762±9       | BR-RR<br>(0.000), JR-RR<br>(0.000), PBR-<br>RR (0.002),<br>WR-RR<br>(0.000)                      |
| Mn<br>10.26  | 0.052 | 9.31±1.32   | 7.90±0.15   | 9.43±0.31   | 8.78±9.64   | 27.5±5.1    | BR-RR<br>(0.001), JR-RR<br>(0.002), PBR-<br>RR (0.002),<br>WR-RR<br>(0.001)                      |
| Na<br>3.64   | 0.189 | 6.70±4.58   | 22.3±6.5    | 8.36±0.11   | 6.06±1.05   | 12.6±2.3    | BR-JR (0.009),<br>BR-PBR<br>(0.004), BR-<br>WR (0.002),<br>BR-RR (0.044)                         |
| Sr<br>45.25  | 0.006 | 0.230±0.123 | 0.334±0.043 | 0.146±0.013 | 0.114±0.031 | 0.548±0.032 | BR-PBR<br>(0.041), BR-<br>RR (0.044), JR-<br>RR (0.002),<br>PBR-RR<br>(0.001), WR-<br>RR (0.003) |
| Zn<br>17.15  | 0.026 | 13.7±3.4    | 15.0±4.2    | 13.2±0.9    | 7.04±4.32   | 20.2±0.5    | BR-PBR<br>(0.039), PBR-                                                                          |

RR (0.003),  
PBR-WR  
(0.039), WR-  
RR (0.040)

---

<sup>a</sup> The Welch  $F$  test corrected value.

<sup>b</sup> The probability of the Welch  $F$  test.

<sup>c</sup> The results of the *post-hoc* Fisher LSD test along with the  $p$ -values in the brackets.



## Caption for figures

**Fig. 1S.** A scheme of the new method for the fast determination of Al, Ba, Ca, Cu, Fe, K, Mg, Mn, Na, Sr, and Zn in rice by inductively coupled plasma optical emission spectrometry (ICP OES) along with the sample preparation by the ultrasound-assisted extraction (USAE)

**Fig. 2S.** The effect of the parameters **A**, **B** and **C** on the overall desirability (*D*). **A**: the temperature of water filling an ultrasonic bath (in °C), **B**: the sonication time (in min), **C**: the volume of a concentrated HNO<sub>3</sub> solution added per 0.5 g of rice (in mL)
