# Supplementary material for: The development and validation of a new method for the fast determination of Al, Ba, Ca, Cu, Fe, K, Mg, Mn, Na, Sr and Zn in rice by inductively coupled plasma optical emission spectrometry
Source: Royal Society of Chemistry journal article supplement (doi:10.1039/d4ay00890a), 2024-01-01
Supplement: d4ay00890a3.pdf [file d4ay00890a3.pdf]

Electronic Supplementary Material (ESI) for *Analytical Methods*.

This journal is © The Royal Society of Chemistry 2024
