# Supplementary material for: The development and validation of a new method for the fast determination of Al, Ba, Ca, Cu, Fe, K, Mg, Mn, Na, Sr and Zn in rice by inductively coupled plasma optical emission spectrometry
Source: Royal Society of Chemistry journal article supplement (doi:10.1039/d4ay00890a), 2024-01-01
Supplement: d4ay00890a4.pdf [file d4ay00890a4.pdf]

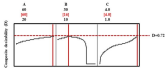

A. The temperature of water filling the ultrasonic bath (in °C)

B. The reaction time (in min)

C. The volume of concentrated  $\text{HNO}_3$  per 1.0 g of rice (in mL)
